# Supplementary material for: Epigenetic reprogramming induces the expansion of cord blood stem cells
Source: JCI journal article supplement (doi:10.1172/jci70313), 2014-04-24
Supplement: sd1 [file 1]

## **SUPPLEMENTAL MATERIAL**

# **Epigenetic Reprogramming Induces the Expansion of Cord Blood Stem Cells**

**Pratima Chaurasia<sup>1</sup>, David C. Gajzer<sup>1</sup>, Christoph Schaniel<sup>2</sup>, Sunita D'Souza<sup>3</sup> and  
Ronald Hoffman<sup>1</sup>**

<sup>1</sup>Division of Hematology/Medical Oncology, Department of Medicine, Tisch Cancer Institute  
Icahn School of Medicine at Mount Sinai, New York, One Gustave L. Levy Place, Box 1079,  
New York 10029

<sup>2</sup>Department of Pharmacology & Systems Therapeutics, Black Family Stem Cell Institute  
Icahn School of Medicine at Mount Sinai, One Gustave L. Levy Place, Box 1496, New York,  
New York 10029

<sup>3</sup>Department of Developmental and Regenerative Biology, Black Family Stem Cell Institute One  
Gustave L. Levy Place, Box 1496, Icahn School of Medicine at Mount Sinai, New York, New  
York 10029

## Supplemental Figure Legends

**Supplemental Figure 1:** Phenotypic analysis of primary cord blood (CB) CD34<sup>+</sup> cells (PC) and CD34<sup>+</sup> cells cultured in the serum-free (SF) media without cytokines (Media alone) or in the presence of VPA alone without cytokines for 7 days. CD34, CD90, CXCR4 (CD184), CD49f and CD45RA expression by cultured cells is shown. The co-expression of CD184, CD49f and CD45RA by CD34<sup>+</sup>CD90<sup>+</sup> cells (red box) is depicted. (n=4)

**Supplemental Figure 2: Effect of HDACIs on HDAC protein levels in HEK293 cells.** HEK293 cells were treated with SCR, C433 and VPA for 2 hr (T1) and 24 hr (T2). Western blots were probed with primary monoclonal antibodies (mAb) to several Class I (1, 2 and 3), Class IIa (4 and 5) and Class IIb (6) HDACs as described in the Methods section. Each HDACI uniformly affected the expression of HDAC2 and HDAC4.  $\beta$ -actin was used as a loading control. (n=4)

**Supplemental Figure 3: Confocal microscopic analysis of pluripotency genes in ES cells.** ES(H9) cells were fixed, permeabilized and stained with OCT4/SOX2/NANOG/ZIC3 antibodies (FITC-green) as described in the Methods section. The nuclei were stained with DAPI (blue). Pluripotency gene proteins including SOX2, OCT4, NANOG and ZIC3 (green) were more prominent in the nuclei than cytoplasm of ES cells. A single optical section of the confocal z-series (scale bar= 25  $\mu$ m (63 X magnification, with optical zoom)) is shown.

**Supplemental Figure 4: Teratoma formation assay.**  $1 \times 10^6$  of ES (H9) cells or CD34<sup>+</sup> cells that were reisolated from control cultures or cultures containing VPA were mixed with Matrigel and injected subcutaneously into the right hind limb of NSG mice (n=9). After 8 weeks, the mice were sacrificed and the masses were dissected, fixed and stained with hematoxylin & eosin. (A and B) Only ES (H9) cells formed teratomas in each of the three mice (left panel), (C) neither

control nor VPA treated CD34<sup>+</sup> cells formed teratomas (right panel), (D) A photomicrograph of the stained section showing three different germ layers (small arrow head- Ectoderm, solid arrow- Mesoderm and broken arrow- Endoderm) (4x), (E) mesoderm (cartilage) (4X), (F) pigmented ectoderm (20X) and (G) endoderm (20X). 3 mice were utilized per group including ES (H9), Control and VPA (n= 9 mice).

Supplemental Figure 1

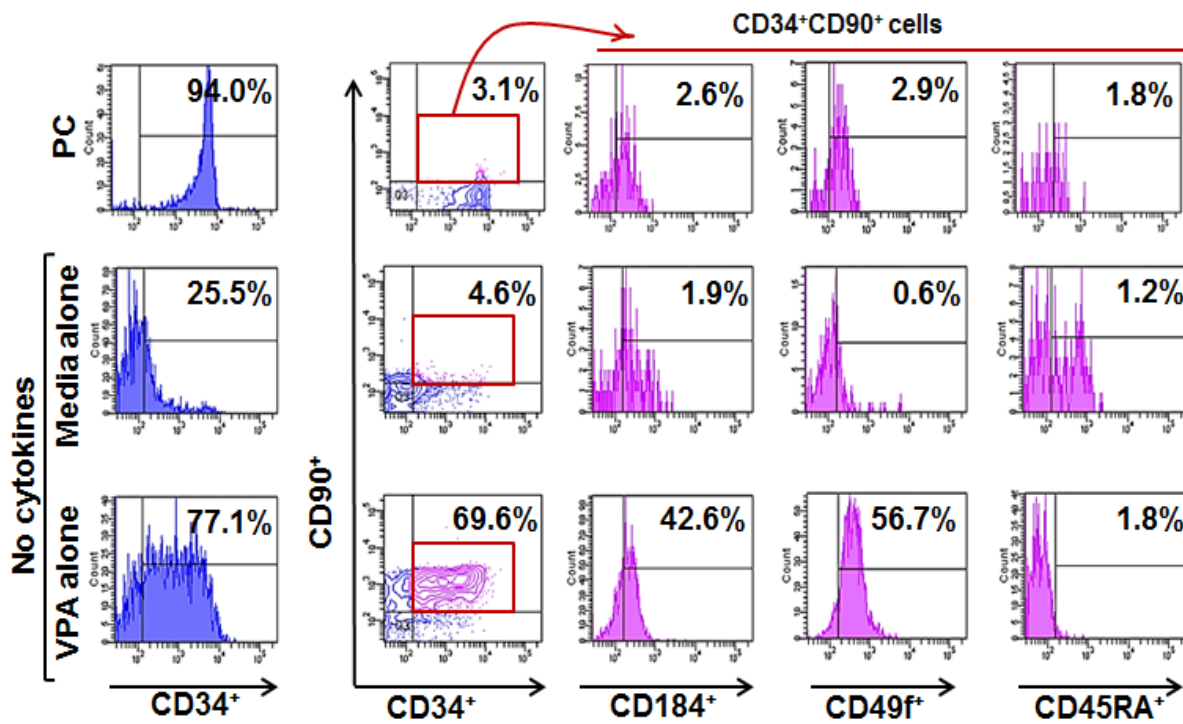



Supplemental Figure 3

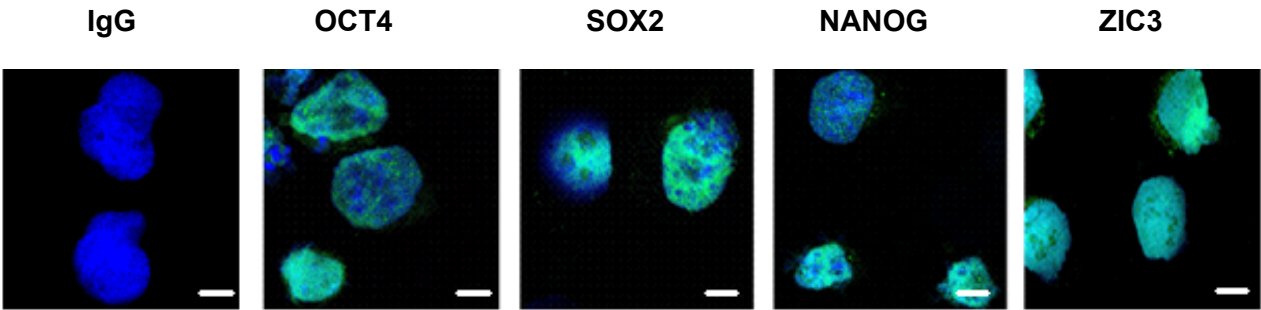

Supplemental Figure 4

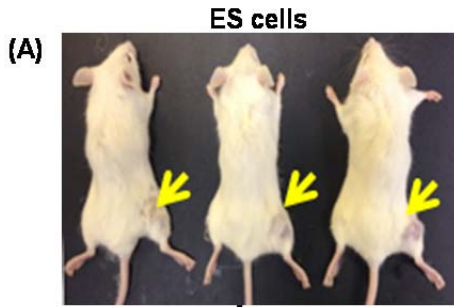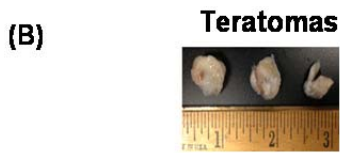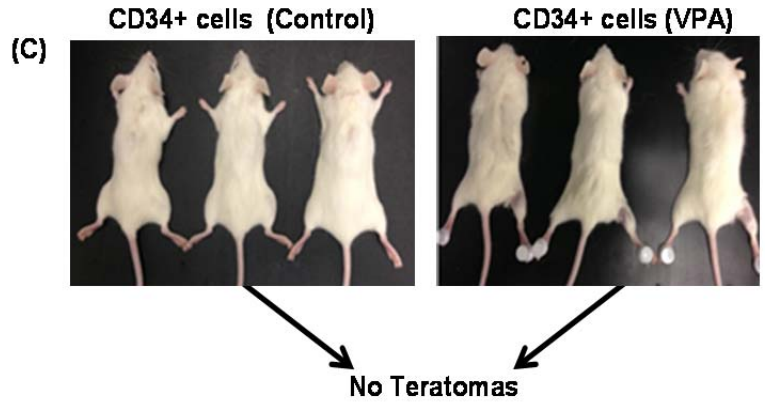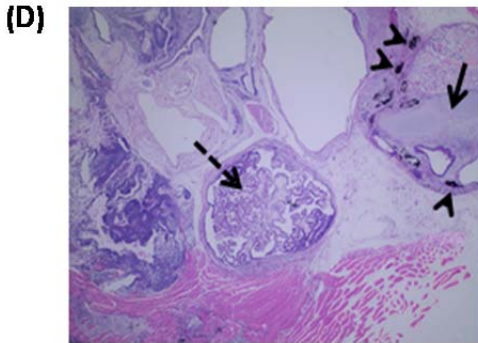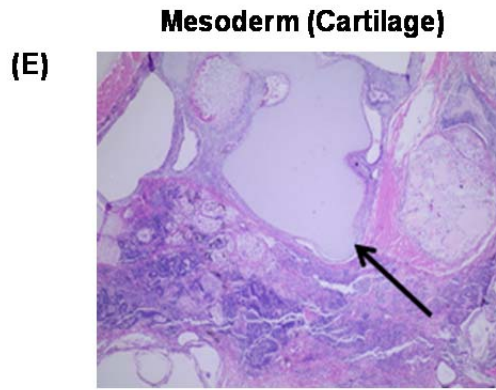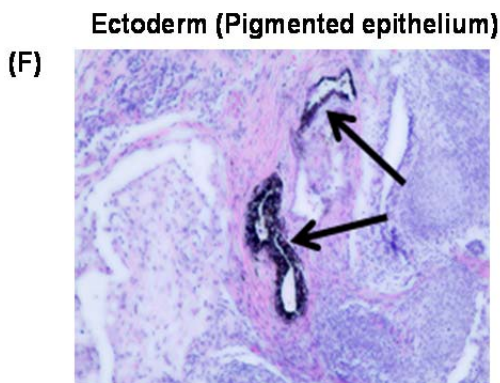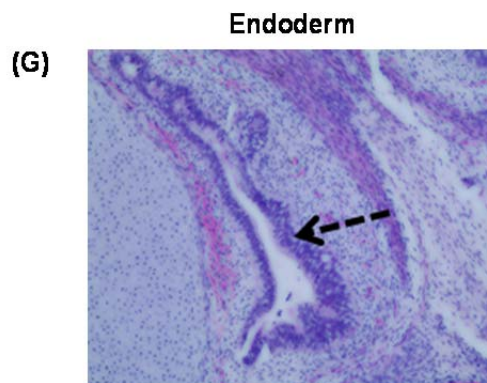

**Supplemental Table 1**

**Densitometric analysis of Western blots (Figure 5):** **Upper panel:** HDAC protein levels were evaluated by densitometry and were normalized to b-ACTIN expression. **Lower panel:** Percent downregulation of class I and class II HDACs with respect to control. A reduction in HDAC1, -3 and -5 occurred in the presence of each HDACI. (Mean  $\pm$  SE, n=4)

| <b>HDAC expression relative to b-ACTIN (%)</b> |                                 |                                 |                                  |                                 |
|------------------------------------------------|---------------------------------|---------------------------------|----------------------------------|---------------------------------|
|                                                | <b>Control</b>                  | <b>SCR</b>                      | <b>VPA</b>                       | <b>C433</b>                     |
| <b>HDAC1</b>                                   | <b>46.1<math>\pm</math>4.6</b>  | <b>21.0<math>\pm</math>20.0</b> | <b>25.48<math>\pm</math>7.78</b> | <b>24.3<math>\pm</math>0.4</b>  |
| <b>HDAC2</b>                                   | <b>67.0<math>\pm</math>25.2</b> | <b>33.0<math>\pm</math>7.0</b>  | <b>45.8<math>\pm</math>25.2</b>  | <b>40.0<math>\pm</math>8.0</b>  |
| <b>HDAC3</b>                                   | <b>40.5<math>\pm</math>7.4</b>  | <b>4.7<math>\pm</math>3.1</b>   | <b>11.4<math>\pm</math>12.4</b>  | <b>28.0<math>\pm</math>20.0</b> |
| <b>HDAC4</b>                                   | <b>43.4<math>\pm</math>11.8</b> | <b>16.6<math>\pm</math>7.8</b>  | <b>30.5<math>\pm</math>9.3</b>   | <b>23.5<math>\pm</math>16.5</b> |
| <b>HDAC5</b>                                   | <b>54.8<math>\pm</math>9.4</b>  | <b>22.8<math>\pm</math>30.6</b> | <b>21.4<math>\pm</math>10.7</b>  | <b>12.6<math>\pm</math>1.9</b>  |
| <b>HDAC6</b>                                   | <b>59.5<math>\pm</math>5.6</b>  | <b>41.3<math>\pm</math>7.9</b>  | <b>54.2<math>\pm</math>7.9</b>   | <b>35.8<math>\pm</math>7.2</b>  |

  

| <b>HDAC down-regulation relative to control (%)</b> |                                 |                                 |                                 |
|-----------------------------------------------------|---------------------------------|---------------------------------|---------------------------------|
|                                                     | <b>SCR</b>                      | <b>VPA</b>                      | <b>C433</b>                     |
| <b>HDAC1</b>                                        | <b>54.3<math>\pm</math>49.2</b> | <b>45.3<math>\pm</math>11.5</b> | <b>40.6<math>\pm</math>15.0</b> |
| <b>HDAC2</b>                                        | <b>49.2<math>\pm</math>8.6</b>  | <b>16.5<math>\pm</math>12.0</b> | <b>41.7<math>\pm</math>5.3</b>  |
| <b>HDAC3</b>                                        | <b>89.0<math>\pm</math>5.7</b>  | <b>40.6<math>\pm</math>19.9</b> | <b>51.4<math>\pm</math>13.6</b> |
| <b>HDAC4</b>                                        | <b>62.78<math>\pm</math>7.9</b> | <b>30.0<math>\pm</math>2.4</b>  | <b>47.2<math>\pm</math>22.5</b> |
| <b>HDAC5</b>                                        | <b>62.6<math>\pm</math>49.4</b> | <b>58.6<math>\pm</math>26.7</b> | <b>70.3<math>\pm</math>1.0</b>  |
| <b>HDAC6</b>                                        | <b>30.9<math>\pm</math>6.8</b>  | <b>9.1<math>\pm</math>4.8</b>   | <b>49.1<math>\pm</math>19.1</b> |

## Supplemental Table 2

### Effects of siRNA transfection on the control culture and VPA treated culture.

**Upper panel:** Control cultures were transfected with siRNA as previously described for VPA cultures in the Methods section. No significant difference in the total cell numbers and percent of CD34<sup>+</sup>CD90<sup>+</sup> cells was observed following 72 hr after transfection with Scrambled and SON siRNA. (n=4) (\*p<0.5, ns)

**Lower panel:** VPA treated cultures were transfected with Scrambled and *GAPDH* siRNA as previously described in the Methods section. No significant difference in the cell number or percent of CD34<sup>+</sup>CD90<sup>+</sup> cells was observed following 72 hr after *GAPDH* siRNA transfection. (n=3) (\*p<0.25, ns)

|    | siRNA                             | (Control culture)<br>Total number of cells/well | (Control culture)<br>CD34+CD90+ cells (%) |
|----|-----------------------------------|-------------------------------------------------|-------------------------------------------|
| 1. | No -transfection                  | $6.6 \times 10^6 \pm 1.5 \times 10^{6*}$        | 17.1±7.8*                                 |
| 2. | Scrambled                         | $6.6 \times 10^6 \pm 1.6 \times 10^{6*}$        | 16.7±4.7*                                 |
| 3. | <i>GAPDH</i>                      | $6.3 \times 10^6 \pm 2.0 \times 10^{6*}$        | 18.3±3.5*                                 |
| 4. | <i>SON (SOX2, OCT4 and NANOG)</i> | $5.9 \times 10^6 \pm 2.0 \times 10^{6*}$        | 21.2±2.5*                                 |

|    | siRNA                             | (VPA culture)<br>Total number of cells/well | (VPA culture)<br>CD34+CD90+ cells (%) |
|----|-----------------------------------|---------------------------------------------|---------------------------------------|
| 1. | No -transfection                  | $4.0 \times 10^6 \pm 0.4 \times 10^{6*}$    | 78.6±2.0*                             |
| 2. | Scrambled                         | $3.9 \times 10^6 \pm 0.5 \times 10^{6*}$    | 76.0±2.4*                             |
| 3. | <i>GAPDH</i>                      | $3.3 \times 10^6 \pm 0.8 \times 10^{6*}$    | 75.0±1.7*                             |
| 4. | <i>SON (SOX2, OCT4 and NANOG)</i> | $3.4 \times 10^6 \pm 0.5 \times 10^{6*}$    | 73.2±3.5*                             |



### Supplemental Table 3

**In vivo functional behavior of VPA-treated CD34<sup>+</sup> cells cultured under serum-free (SF) conditions without cytokines in NOD/SCID/ $\gamma$ c<sup>null</sup> (NSG) mice.**

Bone marrow analysis of NSG mice receiving  $2.0 \times 10^5$  **primary CB CD34<sup>+</sup> cells (PC)** or CD34<sup>+</sup> cells reisolated after 7 days from cultures containing media alone (no cytokines) and cultures containing VPA alone (no cytokines) under serum-free (SF) conditions. The percentage of human cell chimerism (CD45<sup>+</sup>, CD33<sup>+</sup> and CD34<sup>+</sup>) and multilineage hematopoietic cell engraftment including B cells (CD19<sup>+</sup>), granulocytes (CD14<sup>+</sup>), erythroid cells (Glycophorin A (GPA<sup>+</sup>) and megakaryocytes (CD41<sup>+</sup>) after 12-13 weeks of transplantation is shown. (Mean $\pm$ SE, \*p<0.05, (ANOVA P<0.0001). NSG mice recipients (n=15).

| <b>% Human cell engraftment in primary NSG mice</b> |                |                |                 |               |                |               |                |
|-----------------------------------------------------|----------------|----------------|-----------------|---------------|----------------|---------------|----------------|
|                                                     | <b>CD45</b>    | <b>CD33</b>    | <b>CD34</b>     | <b>CD19</b>   | <b>CD14</b>    | <b>GPA</b>    | <b>CD41a</b>   |
| <b>PC (n=5)</b>                                     | 19.4 $\pm$ 4.8 | 4.5 $\pm$ 6.8  | 7.4 $\pm$ 1.9   | 5.7 $\pm$ 3.3 | 6.6 $\pm$ 1.6  | 3.7 $\pm$ 0.7 | 1.2 $\pm$ 0.2  |
| <b>Media Alone (n=5)</b>                            | 8.2 $\pm$ 2.2  | 0.7 $\pm$ 0.2* | 0.76 $\pm$ 0.2* | 5.2 $\pm$ 1.6 | 5.4 $\pm$ 1.3* | 9.9 $\pm$ 2.2 | 0.62 $\pm$ 0.6 |
| <b>VPA Alone (n=5)</b>                              | 12.5 $\pm$ 2.2 | 3.5 $\pm$ 0.6* | 1.6 $\pm$ 0.4*  | 1.9 $\pm$ 1.1 | 2.1 $\pm$ 0.2* | 9.8 $\pm$ 0.8 | 0.90 $\pm$ 0.6 |

## Supplemental Table 4

### Primer sequences for RT-PCR and Q-PCR

| Gene                       | Forward primer sequence (5'-3') | Reverse primer sequence (5'-3') |
|----------------------------|---------------------------------|---------------------------------|
| <b><i>Pseudo OCT4*</i></b> | GAAGGTATTCAGCCAAAC              | CTTAATCCAAAAACCCTGG             |
| <b><i>Pseudo OCT4*</i></b> | CGACCATCTGCCGCTTTGAG            | CCCCCTGTCCCCCATTCTTA            |
| <b><i>OCT4</i></b>         | AACCTGGAGTTTGTGCCAGGGTTT        | TGAACTTCACCTTCCCTCCAACCA        |
| <b><i>SOX2</i></b>         | AGAAGAGGAGAGAGAAAGAAAGGGAGAGA   | GAGAGAGGCCAAACTGGAATCAGGATCAAA  |
| <b><i>NANOG</i></b>        | CCTGAAGACGTGTGAAGATGAG          | GCTGATTAGGCTCCAACCATAC          |
| <b><i>TERT</i></b>         | TGAAAGCCAAGAACGCAGGGATG         | TGTCGAGTCAGCTTGAGCAGGAATG       |
| <b><i>CD34</i></b>         | ACAAACATCACAGAAACGACAGT         | TGACAGGCTAGGCTTCAAGGT           |
| <b><i>SET</i></b>          | GCAAGAAGCGATTGAACACA            | GCAGTGCCTCTTCATCTTCC            |
| <b><i>MYST3</i></b>        | ACTCCACCACCTACGAATGC            | CTCCTTCCTCAGCCTCCTCT            |
| <b><i>SMARCD1</i></b>      | TGGAAGACCTTTCGGAATTG            | CACCTGCATCACCAAACATC            |
| <b><i>ZIC3</i></b>         | GCAAGTCTTCAAGGCGAAG             | CATGCATGTGCTTCTTACGG            |
| <b><i>GAPDH</i></b>        | from Qiagen                     |                                 |

\*Redshaw, Z., and Strain, A.J. 2010. Human haematopoietic stem cells express Oct4 pseudogenes and lack the ability to initiate Oct4 promoter-driven gene expression. *J Negat Results Biomed* 9:2-8.
